# Supplementary material for: Relation of the auroral substorm to the substorm current wedge
Source: Springer Nature journal article supplement (doi:10.1186/s40562-016-0044-5), 2016-04-12
Supplement: MOESM9 [file 40562_2016_44_MOESM9_ESM.docx]

| Time | Event |
| --- | --- |
|  | **Start Substorm Activity** |
| 072100 | Begin increase in coupling functions (opn & UCF) |
| 072200 | Start weak SML bay |
| 073304 | Start plasma sheet thinning at THEMIS C (-15.6,-3.9) |
| 074600 | Sudden decrease in solar wind coupling |
| 074625 | Flow speed begins gradual increase at THEMIS E |
| 075400 | Quasiperiodic oscillations with T~105 s in Bx at THEMIS E |
| 080000 | Sudden end solar wind driving |
|  | **Tail Reconnection Begins** |
| 0803?? | Probable onset of fast reconnection in tail |
| 080340 | Flow burst arrives at THEMIS E |
| 080405 | Luminosity increase at fsim |
| 080414 | Flow burst arrives at THEMIS D |
| 080417 | Pi2 at Fresno |
| 080447 | Sudden start of THEMIS D magnetic variations |
| 080505 | Start of THEMIS E magnetic variations |
| 080532 | Peak in Bt and Start Bz increase at THEMIS C |
| 080914 | Begin weak tailward flow at THEMIS C |
| 081200 | End of weak SML bay |
|  | **Weak Intensification and Flow** |
| 081521 | Weak flow burst at THEMIS E |
| 081750 | Magnetic variations at THEMIS E |
| 082020 | Luminosity increase at fykn |
| 082134 | Weak flow burst at THEMIS D |
| 082136 | Weak magnetic change at THEMIS D |
| 082213 | Luminosity increase at inuv |
| 082350 | Weak tailward flow at THEMIS C |
|  | Auroral Intensification without Negative Bay |
| 082500 | Equatorward moving aurora at Inuvik |
| 082758 | Flow burst arrives at THEMIS D & E |
| 082823 | Begin magnetic variations at THEMIS D |
| 082901 | Begin magnetic variations at THEMIS E |
| 083046 | Pi 2 burst at Fresno |
| 083059 | Luminosity increase at fykn |
| 083324 | Luminosity increase at inuv |
| 083352 | Plasma sheet expands over THEMIS C |
| 083354 | Begin oscillating flow mostly earthward THEMIS C |
| 084146 | Luminosity increase and equatorward motion at Inuvik |
| 084839 | Luminosity increase and equatorward motion at Inuvik |
|  | **Auroral Expansion but No MPB** |
| 085200 | Begin increase in solar wind coupling |
| 085437 | Begin slow buildup of flow |
| 085600 | Flow burst at both D & E |
| 085621 | Begin magnetic changes at THEMIS D |
| 085637 | Begin magnetic changes at THEMIS E |
| 090037 | Luminosity increase at inuv and fykn |
| 090115 | Luminosity increase at inuv and fykn |
| 090200 | negative bay in SML |
| 090700 | End aurora expansion and bay |
| 090705 | Begin plasma sheet thinning at THEMIS C |
| 091100 | Equatorward moving aurora at Inuvik |
|  | **Pseudo breakup** |
| 092900 | negative bay in SML |
| 092924 | Pi2 at Fresno |
|  | **Main Substorm Onset** |
| 093545 | Luminosity increase at fsim, inuv, and fykn |
| 093634 | Start poleward auroral expansion at inuv |
| 093649 | Earthward flow at THEMIS C followed by tailward |
| 093700 | Negative bay in SML |
| 093723 | Peak in Bt and min in Bz at THEMIS C |
| 093801 | Pi2 at Fresno |
| 093817 | Flow burst arrives at THEMIS D & E |
| 093832 | Begin magnetic changes at THEMIS E |
| 093848 | Luminosity increase at fsim |
| 093900 | MPB onset |
| 093908 | Begin magnetic changes at THEMIS D |
| 094900 | Negative bay in SML |
|  | **Weak Negative Bay in Recovery Phase** |
| 100256 | Flow bursts arrive at both THEMIS |
| 100716 | Begin magnetic changes at THEMIS D |
| 100905 | Luminosity increase at fykn |
| 100927 | Begin magnetic changes at THEMIS E |
| 100940 | Weak disturbance in B at THEMIS C |
| 100947 | Begin tailward flow at THEMIS C |
| 101000 | Negative bay in SML during recovery |
